# Supplementary material for: High thermal stability, pH responsive organogels of 2H-benzo[d]1,2,3-triazole derivatives as pharmaceutical crystallization media
Source: Royal Society of Chemistry journal article supplement (doi:10.1039/c8ce01742e), 2018-11-27
Supplement: c8ce01742e1.pdf [file c8ce01742e1.pdf]

## **High thermal stability, pH responsive organogels of 2*H*-benzo[*d*]1,2,3-triazole derivatives as pharmaceutical crystallization media.**

Iván Torres-Moya<sup>a,b</sup>, Basanta Saikia<sup>c</sup>, Pilar Prieto<sup>b\*</sup>, José R. Carrillo<sup>b</sup>, Jonathan W. Steed<sup>a\*</sup>

<sup>a</sup> Department of Chemistry, Durham University, South Road, Durham, DH1 3LE, UK.

<sup>b</sup> Department of Organic Chemistry. University of Castilla La Mancha, 13071 Ciudad Real, Spain.

<sup>c</sup> Department of Chemical Sciences, Tezpur University, Napaam-784028, Assam, India.

### **Contents:**

1. Synthetic schemes
2. Gelation tests.
3. SEM Images
4. Rheology experiments.
5. Unit cell determination

## 1. Synthetic schemes

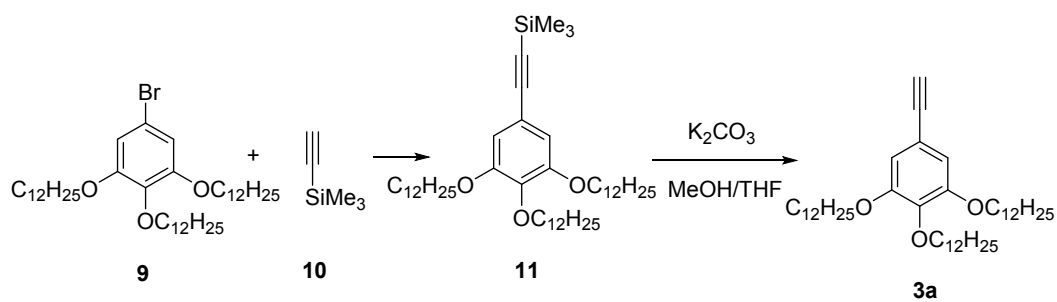

**Scheme S1.** Synthesis of the alkynyl derivative **3a**.

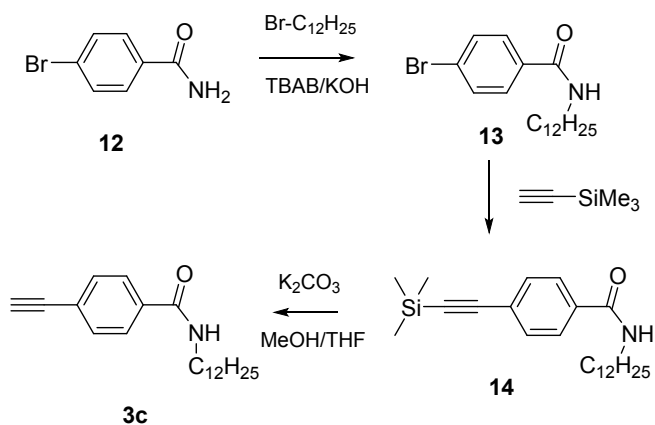

**Scheme S2.** Synthesis of the alkynyl derivative **3c**.

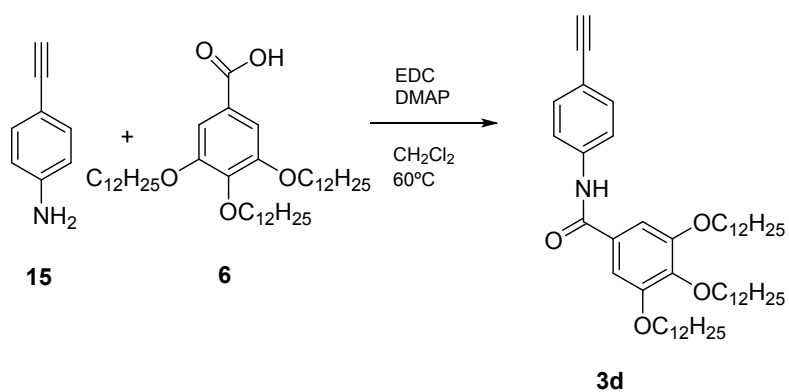

**Scheme S3.** Synthesis of the alkynyl derivative **3d**.

## 2. Gelation tests

(S= Soluble, I= Insoluble, P= Precipitate, PG= Partial Gel, G= Gel)

**Table S1.** Gelation test for **4a** at a concentration of 2% wt.

| Solvent                | 30 min | 4h | 24h | 48h | 72h |
|------------------------|--------|----|-----|-----|-----|
| Chloroform             | S      | S  | S   | S   | S   |
| Dichloromethane        | S      | S  | S   | S   | S   |
| Diethyl ether          | S      | S  | S   | S   | S   |
| Diethylene glycol      | S      | P  | P   | P   | P   |
| DMSO                   | S      | P  | P   | P   | P   |
| Ethanol                | I      | I  | I   | I   | I   |
| Hexane                 | S      | S  | S   | S   | S   |
| THF                    | S      | S  | S   | S   | S   |
| 1,4-dioxane            | S      | S  | S   | S   | S   |
| 1-butanol              | S      | S  | P   | P   | P   |
| 1-pentanol             | S      | S  | PG  | G   | G   |
| 1-propanol             | S      | P  | P   | P   | P   |
| 1-butanol              | S      | P  | P   | P   | P   |
| 2-propanol             | S      | G  | G   | G   | G   |
| Acetone                | S      | S  | P   | P   | P   |
| Acetonitrile           | I      | I  | I   | I   | I   |
| Benzyl alcohol         | I      | I  | I   | I   | I   |
| Methanol               | S      | S  | S   | G   | G   |
| Cyclopentanone         | S      | S  | S   | S   | S   |
| Cyclohexane            | S      | S  | S   | S   | S   |
| Water                  | S      | S  | S   | S   | S   |
| Diisopropylether       | S      | S  | S   | S   | S   |
| DMF                    | I      | I  | I   | I   | I   |
| 1,4-butanediol         | G      | G  | G   | G   | G   |
| Ethyl acetate          | I      | I  | I   | I   | I   |
| 1,2-dibromoethane      | S      | S  | S   | S   | S   |
| Toluene                | S      | S  | S   | S   | S   |
| Nitromethane           | S      | S  | S   | S   | S   |
| o-Xylene               | S      | S  | S   | S   | S   |
| 1,2,4-trichlorobenzene | S      | S  | S   | S   | S   |

**Table S2.** Gelation test for **4a** at a concentration of 1% wt.

| Solvent                | 30 min | 4h | 24h | 48h | 72h |
|------------------------|--------|----|-----|-----|-----|
| Chloroform             | S      | S  | S   | S   | S   |
| Dichloromethane        | S      | S  | S   | S   | S   |
| Diethyl ether          | S      | S  | S   | S   | S   |
| Diethylene glycol      | S      | P  | P   | P   | P   |
| DMSO                   | S      | P  | P   | P   | P   |
| Ethanol                | I      | I  | I   | I   | I   |
| Hexane                 | S      | S  | S   | S   | S   |
| THF                    | S      | S  | S   | S   | S   |
| 1,4-dioxane            | S      | S  | S   | S   | S   |
| 1-butanol              | S      | S  | P   | P   | P   |
| 1-pentanol             | S      | S  | PG  | G   | G   |
| 1-propanol             | S      | P  | P   | P   | P   |
| 1-butanol              | S      | P  | P   | P   | P   |
| 2-propanol             | S      | S  | S   | S   | S   |
| Acetone                | S      | S  | P   | P   | P   |
| Acetonitrile           | I      | I  | I   | I   | I   |
| Benzyl alcohol         | I      | I  | I   | I   | I   |
| Methanol               | S      | S  | S   | S   | S   |
| Cyclopentanone         | S      | S  | S   | S   | S   |
| Cyclohexane            | S      | S  | S   | S   | S   |
| Water                  | S      | S  | S   | S   | S   |
| Diisopropylether       | S      | S  | S   | S   | S   |
| DMF                    | S      | S  | S   | S   | S   |
| 1,4-butanediol         | S      | G  | G   | G   | G   |
| Ethyl acetate          | I      | I  | I   | I   | I   |
| 1,2-dibromoethane      | S      | S  | S   | S   | S   |
| Toluene                | S      | S  | S   | S   | S   |
| Nitromethane           | S      | S  | S   | S   | S   |
| o-Xylene               | S      | S  | S   | S   | S   |
| 1,2,4-trichlorobenzene | S      | S  | S   | S   | S   |

**Table S3.** Gelation test for **4a** at a concentration of 0.5% wt.

| Solvent                | 30 min | 4h | 24h | 48h | 72h |
|------------------------|--------|----|-----|-----|-----|
| Chloroform             | S      | S  | S   | S   | S   |
| Dichloromethane        | S      | S  | S   | S   | S   |
| Diethyl ether          | S      | S  | S   | S   | S   |
| Diethylene glycol      | S      | P  | P   | P   | P   |
| DMSO                   | S      | P  | P   | P   | P   |
| Ethanol                | I      | I  | I   | I   | I   |
| Hexane                 | S      | S  | S   | S   | S   |
| THF                    | S      | S  | S   | S   | S   |
| 1,4-dioxane            | S      | S  | S   | S   | S   |
| 1-butanol              | S      | S  | P   | P   | P   |
| 1-pentanol             | S      | S  | P   | P   | P   |
| 1-propanol             | S      | P  | P   | P   | P   |
| 1-butanol              | S      | P  | P   | P   | P   |
| 2-propanol             | S      | S  | S   | S   | S   |
| Acetone                | S      | S  | P   | P   | P   |
| Acetonitrile           | I      | I  | I   | I   | I   |
| Benzyl alcohol         | I      | I  | I   | I   | I   |
| Methanol               | S      | S  | S   | S   | S   |
| Cyclopentanone         | S      | S  | S   | S   | S   |
| Cyclohexane            | S      | S  | S   | S   | S   |
| Water                  | S      | S  | S   | S   | S   |
| Diisopropylether       | S      | S  | S   | S   | S   |
| DMF                    | S      | S  | S   | S   | S   |
| 1,4-butanediol         | S      | P  | P   | P   | P   |
| Ethyl acetate          | I      | I  | I   | I   | I   |
| 1,2-dibromoethane      | S      | S  | S   | S   | S   |
| Toluene                | S      | S  | S   | S   | S   |
| Nitromethane           | S      | S  | S   | S   | S   |
| o-Xylene               | S      | S  | S   | S   | S   |
| 1,2,4-trichlorobenzene | S      | S  | S   | S   | S   |

**Table S4.** Gelation test for **4b** at a concentration of 2% wt.

| Solvent                | 30 min | 4h | 24h | 48h | 72h |
|------------------------|--------|----|-----|-----|-----|
| Chloroform             | S      | S  | S   | S   | S   |
| Dichloromethane        | S      | S  | S   | S   | S   |
| Diethyl ether          | S      | S  | S   | S   | S   |
| Diethylene glycol      | I      | I  | I   | I   | I   |
| DMSO                   | S      | S  | S   | S   | S   |
| Ethanol                | S      | P  | P   | P   | P   |
| Hexane                 | S      | S  | S   | S   | S   |
| THF                    | S      | S  | S   | S   | S   |
| 1,4-dioxane            | S      | S  | S   | S   | S   |
| 1-butanol              | S      | P  | P   | P   | P   |
| 1-pentanol             | S      | P  | P   | P   | P   |
| 1-propanol             | S      | P  | P   | P   | P   |
| 1-butanol              | S      | P  | P   | P   | P   |
| 2-propanol             | S      | P  | P   | P   | P   |
| Acetone                | S      | S  | S   | S   | S   |
| Acetonitrile           | S      | S  | S   | P   | P   |
| Benzyl alcohol         | I      | I  | I   | I   | I   |
| Methanol               | S      | S  | S   | S   | S   |
| Cyclopentanone         | S      | S  | S   | S   | S   |
| Cyclohexane            | S      | S  | S   | S   | S   |
| Water                  | S      | S  | P   | P   | P   |
| Diisopropylether       | S      | S  | S   | S   | S   |
| DMF                    | S      | S  | S   | S   | S   |
| 1,4-butanediol         | S      | S  | S   | S   | S   |
| Ethyl acetate          | S      | S  | S   | S   | S   |
| 1,2-dibromoethane      | S      | S  | S   | S   | S   |
| Toluene                | S      | S  | S   | S   | S   |
| Nitromethane           | S      | S  | S   | S   | S   |
| o-Xylene               | S      | S  | P   | P   | P   |
| 1,2,4-trichlorobenzene | S      | S  | S   | S   | S   |

**Table S5.** Gelation test for **4b** at a concentration of 1% wt.

| Solvent                | 30 min | 4h | 24h | 48h | 72h |
|------------------------|--------|----|-----|-----|-----|
| Chloroform             | S      | S  | S   | S   | S   |
| Dichloromethane        | S      | S  | S   | S   | S   |
| Diethyl ether          | S      | S  | S   | S   | S   |
| Diethylene glycol      | I      | I  | I   | I   | I   |
| DMSO                   | S      | S  | S   | S   | S   |
| Ethanol                | S      | S  | P   | P   | P   |
| Hexane                 | S      | S  | S   | S   | S   |
| THF                    | S      | S  | S   | S   | S   |
| 1,4-dioxane            | S      | S  | S   | S   | S   |
| 1-butanol              | S      | S  | P   | P   | P   |
| 1-pentanol             | S      | P  | P   | P   | P   |
| 1-propanol             | S      | P  | P   | P   | P   |
| 1-butanol              | S      | S  | P   | P   | P   |
| 2-propanol             | S      | P  | P   | P   | P   |
| Acetone                | S      | S  | S   | S   | S   |
| Acetonitrile           | S      | S  | S   | P   | P   |
| Benzyl alcohol         | I      | I  | I   | I   | I   |
| Methanol               | S      | S  | S   | S   | S   |
| Cyclopentanone         | S      | S  | S   | S   | S   |
| Cyclohexane            | S      | S  | S   | S   | S   |
| Water                  | S      | S  | P   | P   | P   |
| Diisopropylether       | S      | S  | S   | S   | S   |
| DMF                    | S      | S  | S   | S   | S   |
| 1,4-butanediol         | S      | S  | S   | S   | S   |
| Ethyl acetate          | S      | S  | S   | S   | S   |
| 1,2-dibromoethane      | S      | S  | S   | S   | S   |
| Toluene                | S      | S  | S   | S   | S   |
| Nitromethane           | S      | S  | S   | S   | S   |
| o-Xylene               | S      | S  | P   | P   | P   |
| 1,2,4-trichlorobenzene | S      | S  | S   | S   | S   |

**Table S6.** Gelation test for **4b** at a concentration of 0.5% wt.

| Solvent                | 30 min | 4h | 24h | 48h | 72h |
|------------------------|--------|----|-----|-----|-----|
| Chloroform             | S      | S  | S   | S   | S   |
| Dichloromethane        | S      | S  | S   | S   | S   |
| Diethyl ether          | S      | S  | S   | S   | S   |
| Diethylene glycol      | I      | I  | I   | I   | I   |
| DMSO                   | S      | S  | S   | S   | S   |
| Ethanol                | S      | P  | P   | P   | P   |
| Hexane                 | S      | S  | S   | S   | S   |
| THF                    | S      | S  | S   | S   | S   |
| 1,4-dioxane            | S      | S  | S   | S   | S   |
| 1-butanol              | S      | P  | P   | P   | P   |
| 1-pentanol             | S      | P  | P   | P   | P   |
| 1-propanol             | S      | P  | P   | P   | P   |
| 1-butanol              | S      | P  | P   | P   | P   |
| 2-propanol             | S      | P  | P   | P   | P   |
| Acetone                | S      | S  | S   | S   | S   |
| Acetonitrile           | S      | S  | S   | S   | S   |
| Benzyl alcohol         | I      | I  | I   | I   | I   |
| Methanol               | S      | S  | S   | S   | S   |
| Cyclopentanone         | S      | S  | S   | S   | S   |
| Cyclohexane            | S      | S  | S   | S   | S   |
| Water                  | S      | S  | P   | P   | P   |
| Diisopropylether       | S      | S  | S   | S   | S   |
| DMF                    | S      | S  | S   | S   | S   |
| 1,4-butanediol         | S      | S  | S   | S   | S   |
| Ethyl acetate          | S      | S  | S   | S   | S   |
| 1,2-dibromoethane      | S      | S  | S   | S   | S   |
| Toluene                | S      | S  | S   | S   | S   |
| Nitromethane           | S      | S  | S   | S   | S   |
| o-Xylene               | S      | S  | S   | S   | S   |
| 1,2,4-trichlorobenzene | S      | S  | S   | S   | S   |



**Table S7.** Gelation test for **4c** at a concentration of 2% wt.

| Solvent                | 30 min | 4h | 24h | 48h | 72h |
|------------------------|--------|----|-----|-----|-----|
| Chloroform             | S      | P  | P   | P   | P   |
| Dichloromethane        | S      | S  | S   | S   | S   |
| Diethyl ether          | I      | I  | I   | I   | I   |
| Diethylene glycol      | S      | S  | S   | S   | S   |
| DMSO                   | S      | S  | S   | S   | S   |
| Ethanol                | S      | S  | S   | S   | S   |
| Hexane                 | S      | P  | P   | P   | P   |
| THF                    | S      | S  | S   | S   | S   |
| 1,4-dioxane            | I      | I  | I   | I   | I   |
| 1-butanol              | S      | S  | S   | S   | S   |
| 1-pentanol             | S      | S  | S   | S   | S   |
| 1-propanol             | S      | S  | S   | S   | S   |
| 2-butanol              | S      | S  | S   | S   | S   |
| 2-propanol             | S      | S  | S   | S   | S   |
| Acetone                | S      | S  | S   | S   | S   |
| Acetonitrile           | P      | P  | P   | P   | P   |
| Benzyl alcohol         | S      | S  | S   | S   | S   |
| Methanol               | S      | S  | S   | S   | S   |
| Cyclopentanone         | P      | P  | P   | P   | P   |
| Cyclohexane            | S      | S  | S   | P   | P   |
| Water                  | S      | S  | S   | S   | S   |
| Diisopropylether       | I      | I  | I   | I   | I   |
| DMF                    | S      | S  | S   | S   | S   |
| 1,4-butanediol         | S      | PG | PG  | PG  | PG  |
| Ethyl acetate          | I      | I  | I   | I   | I   |
| 1,2-dibromoethane      | I      | I  | I   | I   | I   |
| Toluene                | I      | I  | I   | I   | S   |
| Nitromethane           | P      | P  | P   | P   | P   |
| o-Xylene               | I      | I  | I   | I   | I   |
| 1,2,4-trichlorobenzene | I      | I  | I   | I   | I   |

**Table S8.** Gelation test for **4c** at a concentration of 1% wt.

| Solvent                | 30 min | 4h | 24h | 48h | 72h |
|------------------------|--------|----|-----|-----|-----|
| Chloroform             | S      | S  | S   | P   | P   |
| Dichloromethane        | S      | S  | S   | S   | S   |
| Diethyl ether          | I      | I  | I   | I   | I   |
| Diethylene glycol      | S      | S  | S   | S   | S   |
| DMSO                   | S      | S  | S   | S   | S   |
| Ethanol                | S      | S  | S   | S   | S   |
| Hexane                 | S      | P  | P   | P   | P   |
| THF                    | S      | S  | S   | S   | S   |
| 1,4-dioxane            | I      | I  | I   | I   | I   |
| 1-butanol              | S      | S  | S   | S   | S   |
| 1-pentanol             | S      | S  | S   | S   | S   |
| 1-propanol             | S      | S  | S   | S   | S   |
| 2-butanol              | S      | S  | S   | S   | S   |
| 2-propanol             | S      | S  | S   | S   | S   |
| Acetone                | S      | S  | S   | S   | S   |
| Acetonitrile           | S      | P  | P   | P   | P   |
| Benzyl alcohol         | S      | S  | S   | S   | S   |
| Methanol               | S      | S  | S   | S   | S   |
| Cyclopentanone         | P      | P  | P   | P   | P   |
| Cyclohexane            | S      | S  | S   | P   | P   |
| Water                  | S      | S  | S   | S   | S   |
| Diisopropylether       | I      | I  | I   | I   | I   |
| DMF                    | S      | S  | S   | S   | S   |
| 1,4-butanediol         | S      | S  | PG  | PG  | PG  |
| Ethyl acetate          | I      | I  | I   | I   | I   |
| 1,2-dibromoethane      | I      | I  | I   | I   | I   |
| Toluene                | I      | I  | I   | I   | S   |
| Nitromethane           | P      | P  | P   | P   | P   |
| o-Xylene               | I      | I  | I   | I   | I   |
| 1,2,4-trichlorobenzene | I      | I  | I   | I   | I   |

**Table S9.** Gelation test for **4c** at a concentration of 0.5% wt.

| Solvent                | 30 min | 4h | 24h | 48h | 72h |
|------------------------|--------|----|-----|-----|-----|
| Chloroform             | S      | S  | S   | S   | S   |
| Dichloromethane        | S      | S  | S   | S   | S   |
| Diethyl ether          | I      | I  | I   | I   | I   |
| Diethylene glycol      | S      | S  | S   | S   | S   |
| DMSO                   | S      | S  | S   | S   | S   |
| Ethanol                | S      | S  | S   | S   | S   |
| Hexane                 | S      | P  | P   | P   | P   |
| THF                    | S      | S  | S   | S   | S   |
| 1,4-dioxane            | I      | I  | I   | I   | I   |
| 1-butanol              | S      | S  | S   | S   | S   |
| 1-pentanol             | S      | S  | S   | S   | S   |
| 1-propanol             | S      | S  | S   | S   | S   |
| 2-butanol              | S      | S  | S   | S   | S   |
| 2-propanol             | S      | S  | S   | S   | S   |
| Acetone                | S      | S  | S   | S   | S   |
| Acetonitrile           | S      | S  | P   | P   | P   |
| Benzyl alcohol         | S      | S  | S   | S   | S   |
| Methanol               | S      | S  | S   | S   | S   |
| Cyclopentanone         | P      | P  | P   | P   | P   |
| Cyclohexane            | S      | S  | S   | P   | P   |
| Water                  | S      | S  | S   | S   | S   |
| Diisopropylether       | I      | I  | I   | I   | I   |
| DMF                    | S      | S  | S   | S   | S   |
| 1,4-butanediol         | S      | S  | S   | S   | S   |
| Ethyl acetate          | S      | S  | P   | P   | P   |
| 1,2-dibromoethane      | I      | I  | I   | I   | I   |
| Toluene                | I      | I  | I   | I   | S   |
| Nitromethane           | P      | P  | P   | P   | P   |
| o-Xylene               | I      | I  | I   | I   | I   |
| 1,2,4-trichlorobenzene | I      | I  | I   | I   | I   |

**Table S10.** Gelation test for **4d** at a concentration of 2% wt.

| Solvent                | 30 min | 4h | 24h | 48h | 72h |
|------------------------|--------|----|-----|-----|-----|
| Chloroform             | S      | S  | S   | S   | S   |
| Dichloromethane        | S      | S  | S   | S   | S   |
| Diethyl ether          | S      | S  | S   | S   | S   |
| Diethylene glycol      | S      | S  | G   | G   | G   |
| DMSO                   | S      | S  | S   | P   | P   |
| Ethanol                | S      | P  | P   | P   | P   |
| Hexane                 | S      | S  | S   | S   | S   |
| THF                    | S      | S  | S   | S   | S   |
| 1,4-dioxane            | S      | S  | S   | S   | S   |
| 1-butanol              | S      | S  | S   | S   | S   |
| 1-pentanol             | S      | S  | S   | S   | S   |
| 1-propanol             | S      | S  | S   | S   | S   |
| 2-butanol              | S      | S  | S   | S   | S   |
| 2-propanol             | S      | S  | S   | S   | S   |
| Acetone                | S      | S  | S   | S   | S   |
| Acetonitrile           | S      | P  | P   | P   | P   |
| Benzyl alcohol         | S      | S  | S   | S   | S   |
| Methanol               | S      | S  | S   | S   | P   |
| Cyclopentanone         | S      | S  | S   | S   | S   |
| Cyclohexane            | S      | S  | S   | S   | S   |
| Water                  | S      | P  | P   | P   | P   |
| Diisopropylether       | S      | S  | S   | S   | S   |
| DMF                    | S      | S  | G   | G   | G   |
| 1,4-butanediol         | S      | S  | S   | S   | S   |
| Ethyl acetate          | S      | S  | S   | S   | S   |
| 1,2-dibromoethane      | S      | S  | S   | S   | S   |
| Toluene                | S      | S  | S   | S   | S   |
| Nitromethane           | S      | S  | S   | S   | S   |
| o-Xylene               | S      | S  | S   | S   | S   |
| 1,2,4-trichlorobenzene | S      | S  | S   | S   | S   |

**Table S11.** Gelation test for **4d** at a concentration of 1% wt.

| Solvent                | 30 min | 4h | 24h | 48h | 72h |
|------------------------|--------|----|-----|-----|-----|
| Chloroform             | S      | S  | S   | S   | S   |
| Dichloromethane        | S      | S  | S   | S   | S   |
| Diethyl ether          | S      | S  | S   | S   | S   |
| Diethylene glycol      | S      | S  | S   | S   | S   |
| DMSO                   | S      | S  | S   | S   | S   |
| Ethanol                | S      | S  | P   | P   | P   |
| Hexane                 | S      | S  | S   | S   | S   |
| THF                    | S      | S  | S   | S   | S   |
| 1,4-dioxane            | S      | S  | S   | S   | S   |
| 1-butanol              | S      | S  | S   | S   | S   |
| 1-pentanol             | S      | S  | S   | S   | S   |
| 1-propanol             | S      | S  | S   | S   | S   |
| 2-butanol              | S      | S  | S   | S   | S   |
| 2-propanol             | S      | S  | S   | S   | S   |
| Acetone                | S      | S  | S   | S   | S   |
| Acetonitrile           | S      | S  | P   | P   | P   |
| Benzyl alcohol         | S      | S  | S   | S   | S   |
| Methanol               | S      | S  | S   | S   | P   |
| Cyclopentanone         | S      | S  | S   | S   | S   |
| Cyclohexane            | S      | S  | S   | S   | S   |
| Water                  | S      | S  | P   | P   | P   |
| Diisopropylether       | S      | S  | S   | S   | S   |
| DMF                    | S      | S  | S   | S   | S   |
| 1,4-butanediol         | S      | S  | S   | S   | S   |
| Ethyl acetate          | S      | S  | S   | S   | S   |
| 1,2-dibromoethane      | S      | S  | S   | S   | S   |
| Toluene                | S      | S  | S   | S   | S   |
| Nitromethane           | S      | S  | S   | S   | S   |
| o-Xylene               | S      | S  | S   | S   | S   |
| 1,2,4-trichlorobenzene | S      | S  | S   | S   | S   |

**Table S12.** Gelation test for **4d** at a concentration of 0.5% wt.

| Solvent                | 30 min | 4h | 24h | 48h | 72h |
|------------------------|--------|----|-----|-----|-----|
| Chloroform             | S      | S  | S   | S   | S   |
| Dichloromethane        | S      | S  | S   | S   | S   |
| Diethyl ether          | S      | S  | S   | S   | S   |
| Diethylene glycol      | S      | S  | S   | S   | S   |
| DMSO                   | S      | S  | S   | S   | S   |
| Ethanol                | S      | S  | P   | P   | P   |
| Hexane                 | S      | S  | S   | S   | S   |
| THF                    | S      | S  | S   | S   | S   |
| 1,4-dioxane            | S      | S  | S   | S   | S   |
| 1-butanol              | S      | S  | S   | S   | S   |
| 1-pentanol             | S      | S  | S   | S   | S   |
| 1-propanol             | S      | S  | S   | S   | S   |
| 2-butanol              | S      | S  | S   | S   | S   |
| 2-propanol             | S      | S  | S   | S   | S   |
| Acetone                | S      | S  | S   | S   | S   |
| Acetonitrile           | S      | S  | P   | P   | P   |
| Benzyl alcohol         | S      | S  | S   | S   | S   |
| Methanol               | S      | S  | S   | S   | P   |
| Cyclopentanone         | S      | S  | S   | S   | S   |
| Cyclohexane            | S      | S  | S   | S   | S   |
| Water                  | S      | S  | P   | P   | P   |
| Diisopropylether       | S      | S  | S   | S   | S   |
| DMF                    | S      | S  | S   | S   | S   |
| 1,4-butanediol         | S      | S  | S   | S   | S   |
| Ethyl acetate          | S      | S  | S   | S   | S   |
| 1,2-dibromoethane      | S      | S  | S   | S   | S   |
| Toluene                | S      | S  | S   | S   | S   |
| Nitromethane           | S      | S  | S   | S   | S   |
| o-Xylene               | S      | S  | S   | S   | S   |
| 1,2,4-trichlorobenzene | S      | S  | S   | S   | S   |

**Table S13.** Gelation test for **4e** at a concentration of 2% wt.

| Solvent                | 30 min | 4h | 24h | 48h | 72h |
|------------------------|--------|----|-----|-----|-----|
| Chloroform             | P      | P  | P   | P   | P   |
| Dichloromethane        | P      | P  | P   | P   | P   |
| Diethyl ether          | P      | P  | P   | P   | P   |
| Diethylene glycol      | I      | I  | I   | I   | I   |
| DMSO                   | S      | S  | S   | S   | S   |
| Ethanol                | PG     | G  | G   | G   | G   |
| Hexane                 | P      | P  | P   | P   | P   |
| THF                    | P      | P  | P   | P   | P   |
| 1,4-dioxane            | I      | I  | I   | I   | I   |
| 1-butanol              | G      | G  | G   | G   | G   |
| 1-pentanol             | P      | P  | P   | P   | P   |
| 1-propanol             | G      | G  | G   | G   | G   |
| 2-butanol              | PG     | PG | PG  | PG  | PG  |
| 2-propanol             | PG     | PG | PG  | PG  | PG  |
| Acetone                | P      | P  | P   | P   | P   |
| Acetonitrile           | S      | P  | P   | P   | P   |
| Benzyl alcohol         | S      | PG | PG  | PG  | PG  |
| Methanol               | G      | G  | G   | G   | G   |
| Cyclopentanone         | P      | P  | P   | P   | P   |
| Cyclohexane            | P      | P  | P   | P   | P   |
| Water                  | S      | S  | S   | S   | S   |
| Diisopropylether       | I      | I  | I   | I   | I   |
| DMF                    | PG     | G  | G   | G   | G   |
| 1,4-butanediol         | PG     | PG | PG  | PG  | PG  |
| Ethyl acetate          | S      | S  | S   | S   | P   |
| 1,2-dibromoethane      | P      | P  | P   | P   | P   |
| Toluene                | P      | P  | P   | P   | P   |
| Nitromethane           | P      | P  | P   | P   | P   |
| o-Xylene               | P      | P  | P   | P   | P   |
| 1,2,4-trichlorobenzene | S      | P  | P   | P   | P   |

**Table S14.** Gelation test for **4e** at a concentration of 1% wt.

| Solvent                | 30 min | 4h | 24h | 48h | 72h |
|------------------------|--------|----|-----|-----|-----|
| Chloroform             | P      | P  | P   | P   | P   |
| Dichloromethane        | P      | P  | P   | P   | P   |
| Diethyl ether          | P      | P  | P   | P   | P   |
| Diethylene glycol      | I      | I  | I   | I   | I   |
| DMSO                   | S      | S  | S   | S   | S   |
| Ethanol                | G      | G  | G   | G   | G   |
| Hexane                 | S      | S  | S   | G   | G   |
| THF                    | P      | P  | P   | P   | P   |
| 1,4-dioxane            | P      | P  | P   | P   | P   |
| 1-butanol              | G      | G  | G   | G   | G   |
| 1-pentanol             | P      | P  | P   | P   | P   |
| 1-propanol             | G      | G  | G   | G   | G   |
| 2-butanol              | PG     | G  | G   | G   | G   |
| 2-propanol             | G      | G  | G   | G   | G   |
| Acetone                | P      | P  | P   | P   | P   |
| Acetonitrile           | S      | P  | P   | P   | P   |
| Benzyl alcohol         | S      | S  | PG  | PG  | PG  |
| Methanol               | G      | G  | G   | G   | G   |
| Cyclopentanone         | P      | P  | P   | P   | P   |
| Cyclohexane            | P      | P  | P   | P   | P   |
| Water                  | S      | S  | S   | P   | P   |
| Diisopropylether       | I      | I  | I   | I   | I   |
| DMF                    | S      | S  | S   | PG  | PG  |
| 1,4-butanediol         | PG     | PG | G   | G   | G   |
| Ethyl acetate          | S      | P  | P   | P   | P   |
| 1,2-dibromoethane      | P      | P  | P   | P   | P   |
| Toluene                | P      | P  | P   | P   | P   |
| Nitromethane           | P      | P  | P   | P   | P   |
| o-Xylene               | P      | P  | P   | P   | P   |
| 1,2,4-trichlorobenzene | S      | P  | P   | P   | P   |



**Table S15.** Gelation test for **4e** at a concentration of 0.5% wt.

| Solvent                | 30 min | 4h | 24h | 48h | 72h |
|------------------------|--------|----|-----|-----|-----|
| Chloroform             | S      | P  | P   | P   | P   |
| Dichloromethane        | S      | P  | P   | P   | P   |
| Diethyl ether          | P      | P  | P   | P   | P   |
| Diethylene glycol      | I      | I  | I   | I   | I   |
| DMSO                   | S      | S  | S   | S   | S   |
| Ethanol                | G      | G  | G   | G   | G   |
| Hexane                 | S      | P  | P   | P   | P   |
| THF                    | S      | P  | P   | P   | P   |
| 1,4-dioxane            | I      | I  | I   | I   | I   |
| 1-butanol              | G      | G  | G   | G   | G   |
| 1-pentanol             | S      | S  | S   | S   | S   |
| 1-propanol             | G      | G  | G   | G   | G   |
| 2-butanol              | G      | G  | G   | G   | G   |
| 2-propanol             | G      | G  | G   | G   | G   |
| Acetone                | S      | P  | P   | P   | P   |
| Acetonitrile           | S      | P  | P   | P   | P   |
| Benzyl alcohol         | S      | S  | S   | P   | P   |
| Methanol               | PG     | PG | PG  | PG  | PG  |
| Cyclopentanone         | P      | P  | P   | P   | P   |
| Cyclohexane            | P      | P  | P   | P   | P   |
| Water                  | S      | S  | P   | P   | P   |
| Diisopropylether       | I      | I  | I   | I   | I   |
| DMF                    | S      | S  | S   | S   | S   |
| 1,4-butanediol         | G      | G  | G   | G   | G   |
| Ethyl acetate          | S      | S  | S   | S   | P   |
| 1,2-dibromoethane      | P      | P  | P   | P   | P   |
| Toluene                | S      | P  | P   | P   | P   |
| Nitromethane           | P      | P  | P   | P   | P   |
| o-Xylene               | P      | P  | P   | P   | P   |
| 1,2,4-trichlorobenzene | S      | P  | P   | P   | P   |

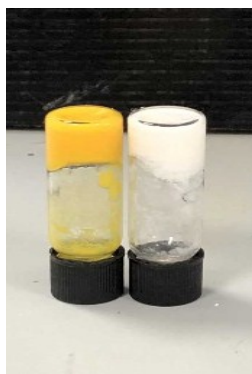

**Figure S1.** Gels for **4a** at 1% wt in (from left to right) 1-pentanol and 1,4-butanediol.

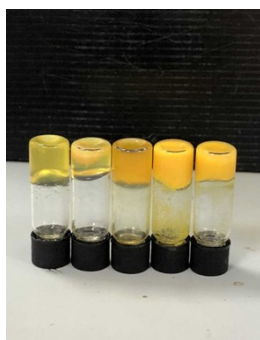

**Figure S2.** Gels for **4e** at 2% wt in (from left to right) in DMF, Ethanol, Methanol, 1-butanol and 1-propanol.

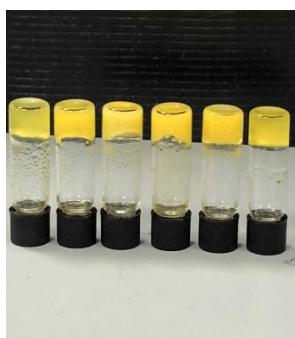

**Figure S3.** Gels for **4e** at 0.5% wt in (from left to right) in Ethanol, 1-butanol, 1-propanol, 2-butanol, 2-propanol and 1,4-butanediol.

### 3. SEM Images

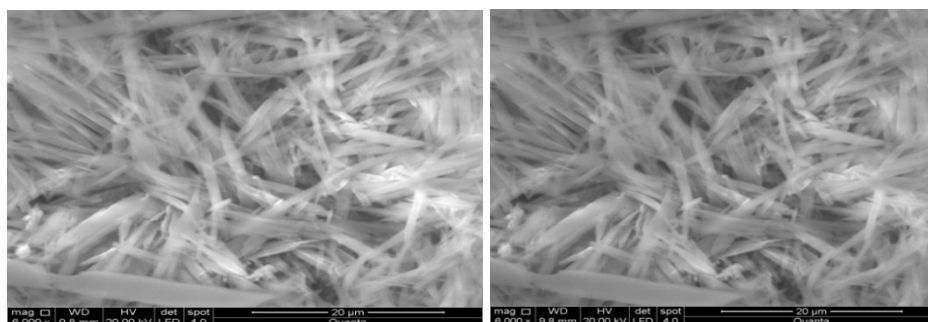

**Figure S4.** SEM images for compound **4a**.

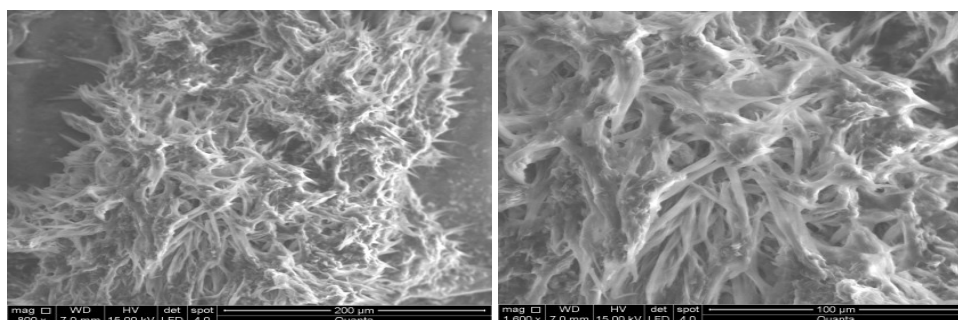

**Figure S5.** SEM images for compound **4c**.

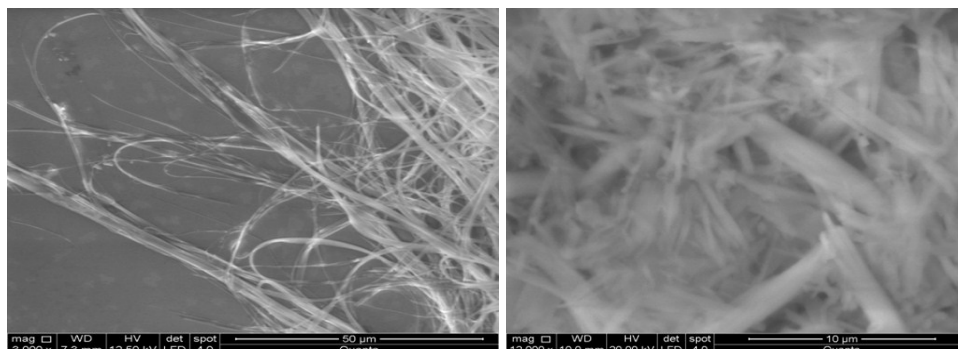

**Figure S6.** SEM images for compound **4d**.

#### 4. Rheology experiments

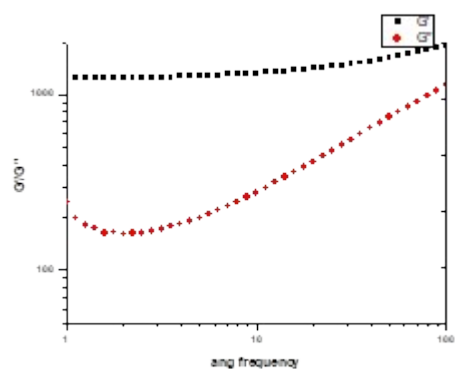

**Figure S7.** Frequency sweep for **4a** at 2% wt in 1,4-butanediol.

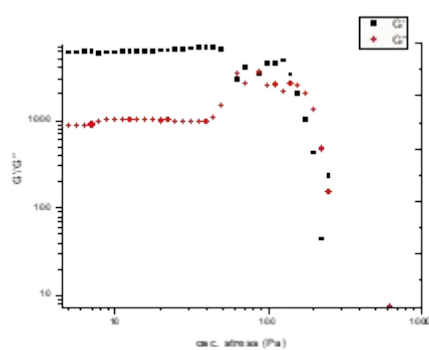

**2% wt 2-propanol**  
 $\sigma = 63$  Pa

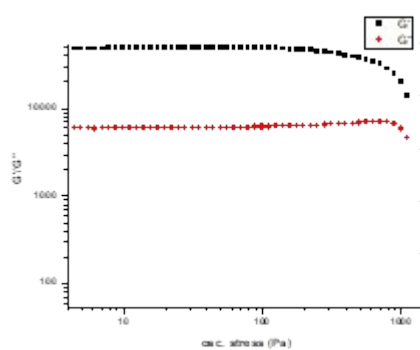

**2% wt Methanol**  
 $\sigma = 1259$  Pa

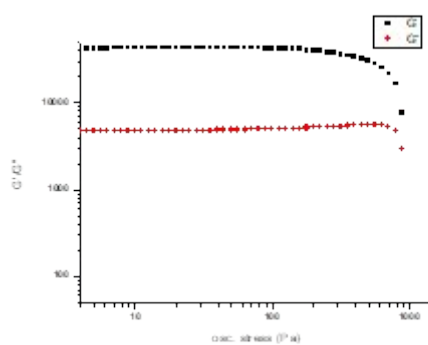

**2% wt 1,4-butanediol**  
 $\sigma = 914$  Pa

**Figure S8.** Stress sweep for **4a** at 2% wt in different solvents.

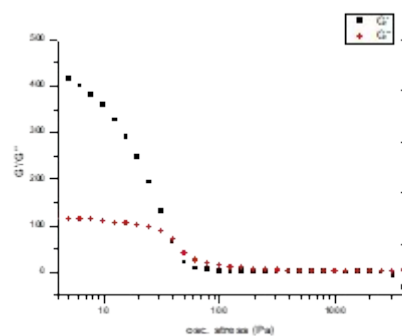

2% wt Diethylene glycol  
 $\sigma = 40$  Pa

Figure S9. Stress sweep for **4d** at 2% wt in different solvents.

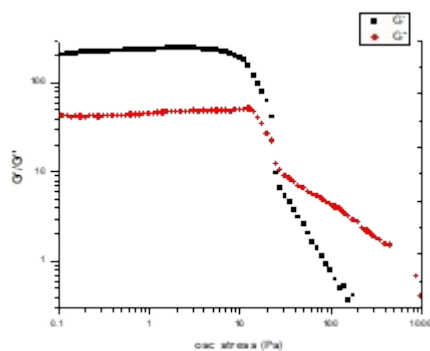

2% wt Methanol  
 $\sigma = 25$  Pa

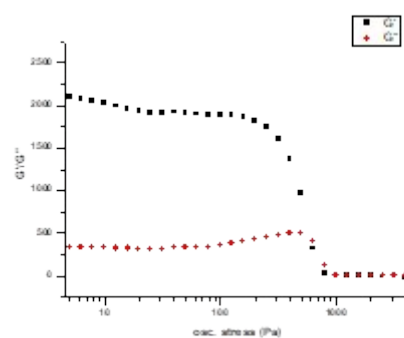

2% wt DMF  
 $\sigma = 631$  Pa

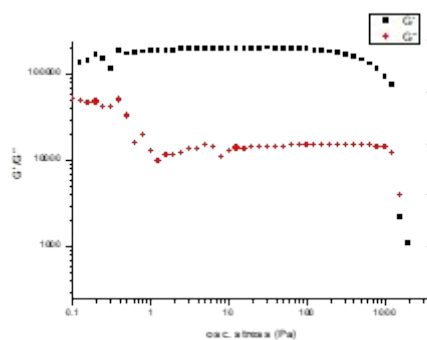

2% wt 1-butanol  
 $\sigma = 1585$  Pa

Figure S10. Stress sweep for **4e** at 2% wt in different solvents.

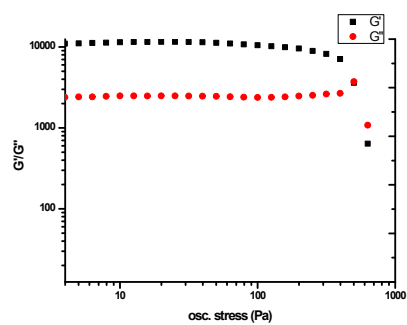

2% wt Ethanol  
 $\sigma = 501$  Pa

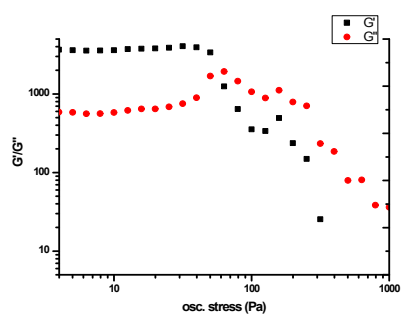

1% wt Ethanol  
 $\sigma = 100$  Pa

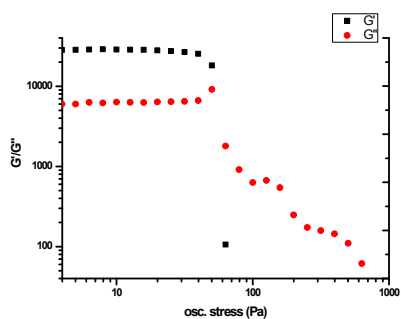

0.5% wt Ethanol  
 $\sigma = 63$  Pa

**Figure S11.** Comparison of the Stress sweep rheology in ethanol for **4e** at different concentrations.

## 5. Unit cell determination

a= 8.156(2)  
b= 8.480(2)  
c= 15.406 (4)  
V=1062.7(7)

**Monoclinic P**

**Polymorph II**

a= 8.8478 (4)  
b= 13.352 (6)  
c= 14.1584 (6)  
V= 1480.77

**Orthorombic C**

**Polymorph I**

**Figure S12.** Unit cell determination for crystallization of sulfathiazole in absence of the gel (left) or in presence of the gel (right).
